# Supplementary material
Source: PubMed Central journal article supplement (PMC4782610)
Supplement: NIHMS762550-supplement-Supplemental_data.pdf [file NIHMS762550-supplement-Supplemental_data.pdf]

| Appendix 1: Clinical, Radiologic and Pathologic Details on Patients with Specific Mutations |                                            |                         |                                                    |                                |
|---------------------------------------------------------------------------------------------|--------------------------------------------|-------------------------|----------------------------------------------------|--------------------------------|
| Age/Sex                                                                                     | Radiographic classification and tumor site | Pathology and Molecular | Treatment                                          | Survival Outcome               |
| <b>Pt #1</b> 56 y/o male                                                                    | Diffuse, Non-Enhancing Pontine Tumor       | AA, IDH1 mut (R132H)    | STB, RT UNK dose,                                  | Died 12 months from diagnosis  |
| <b>Pt #2</b> 40 y/o male                                                                    | Diffuse, Enhancing, Medullary Tumor        | DA, IDH1 mut (R132H)    | STB, No RT, treated with upfront TMZ               | Alive and stable at 14 months  |
| <b>Pt #3</b> 57 y/o male                                                                    | Diffuse, Enhancing Pontine Tumor           | GB, IDH1 mut (R132H)*   | Biopsy NOS, 5400 cGy Conc plus Adj TMZ             | Alive and stable at 7 months   |
| <b>Pt #4</b> 34 y/o male                                                                    | Diffuse, Enhancing Medullary Tumor         | GB, PIK3CA mut (H1047R) | STB, 4500 cGy RT, TMZ plus Bev at tumor recurrence | Alive and stable at 40 months  |
| <b>Pt #5</b> 56 y/o female                                                                  | Diffuse, Enhancing Medullary Tumor         | AA, PIK3CA mut (H1047R) | STR, 5000 cGy RT                                   | Alive and stable at 163 months |
| <b>Pt #6</b> 36 y/o female**                                                                | Diffuse, Enhancing, Medullary Tumor        | GS, BRAF mut (V600E)    | STR, 3060 cGy RT**, Conc TMZ, Bev at recurrence    | Alive and stable at 36 months  |

Abbreviations: *AA* anaplastic astrocytoma, *IDH1* isocitrate dehydrogenase 1, *mut* mutation, *DA* diffuse astrocytoma, *GB* glioblastoma, *GS* gliosarcoma, *STB* stereotactic biopsy, *RT* radiotherapy, *UNK* unknown, *TMZ* temozolomide, *Conc* concurrent, *Adj* adjuvant, *Bev* bevacizumab

\*IDH1 (R132H) mutation found on both immunohistochemistry and Sequenom™ panel testing.

\*\*Patient #6 has a history of suspected segmental NF1 and received radiotherapy for a cervical pilocytic astrocytoma 24 years prior to diagnosis of a gliosarcoma
